# Supplementary material for: Utilizing Electronic Health Records (EHR) and Tumor Panel Sequencing to Demystify Prognosis of Cancer of Unknown Primary (CUP) patients
Source: Research Square preprint supplement (doi:10.21203/rs.3.rs-2450090/v1), 2023-01-10
Supplement: Supplementary file 1 [file ca58523a20b23fb26d9170a8.pdf]

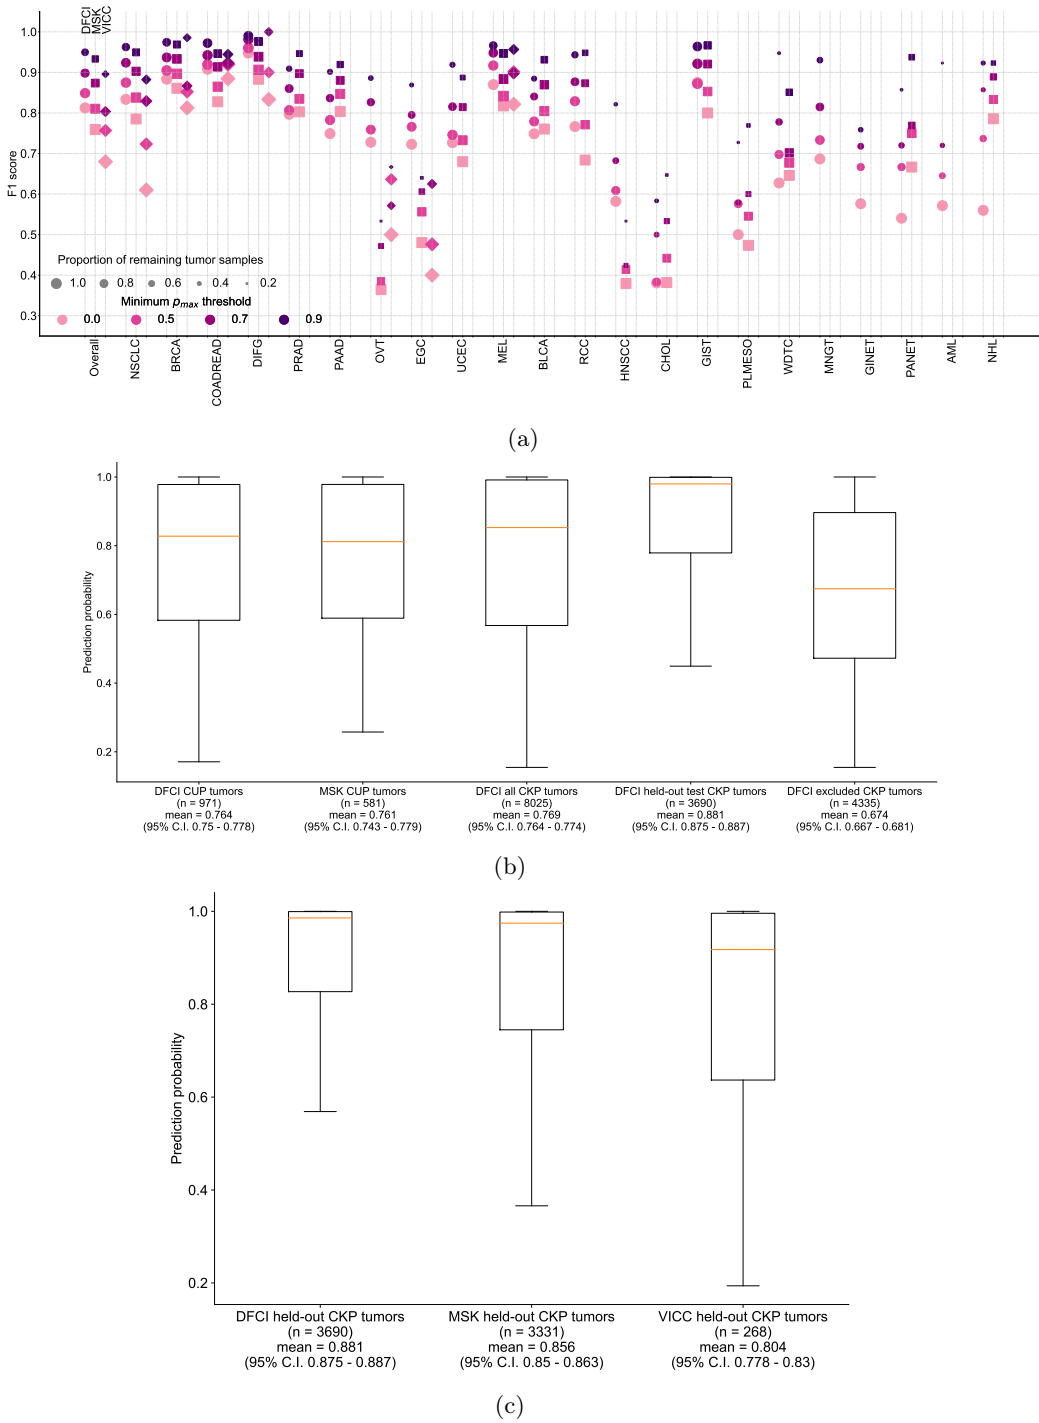

Figure S1

Figure S1: **OncoNPC prediction performances and confidences (i.e.,  $p_{\max}$ ) across chosen cohorts and centers.** **(a)** Center-specific OncoNPC performance (in weighted F1) on the test CKP tumor samples ( $n = 7,289$ ). The figure is a breakdown of Fig. 2c based on cancer center (DFCI:  $\circ$ , MSK:  $\square$ , VICC:  $\diamond$ ). The performance was evaluated at 4 different prediction confidences (i.e., minimum  $p_{\max}$  thresholds). Each dot size is scaled by the proportion of tumor samples retained. See Table S1 for the center-specific number of test CKP tumor samples broken down by cancer types and prediction confidence thresholds. **(b), (c)** Box plots of prediction confidences ( $p_{\max}$ ) across **(b)** DFCI CUP tumors, MSK CUP tumors, all DFCI CKP tumors, DFCI held-out CKP tumors, and DFCI excluded CKP tumors, and **(c)** DFCI held-out CKP tumors, MSK held-out CKP tumors, and VICC held-out CKP tumors. The figures display medians, lower and upper quartiles, as well as the mean and 95% confidence intervals, along with the number of tumor samples.

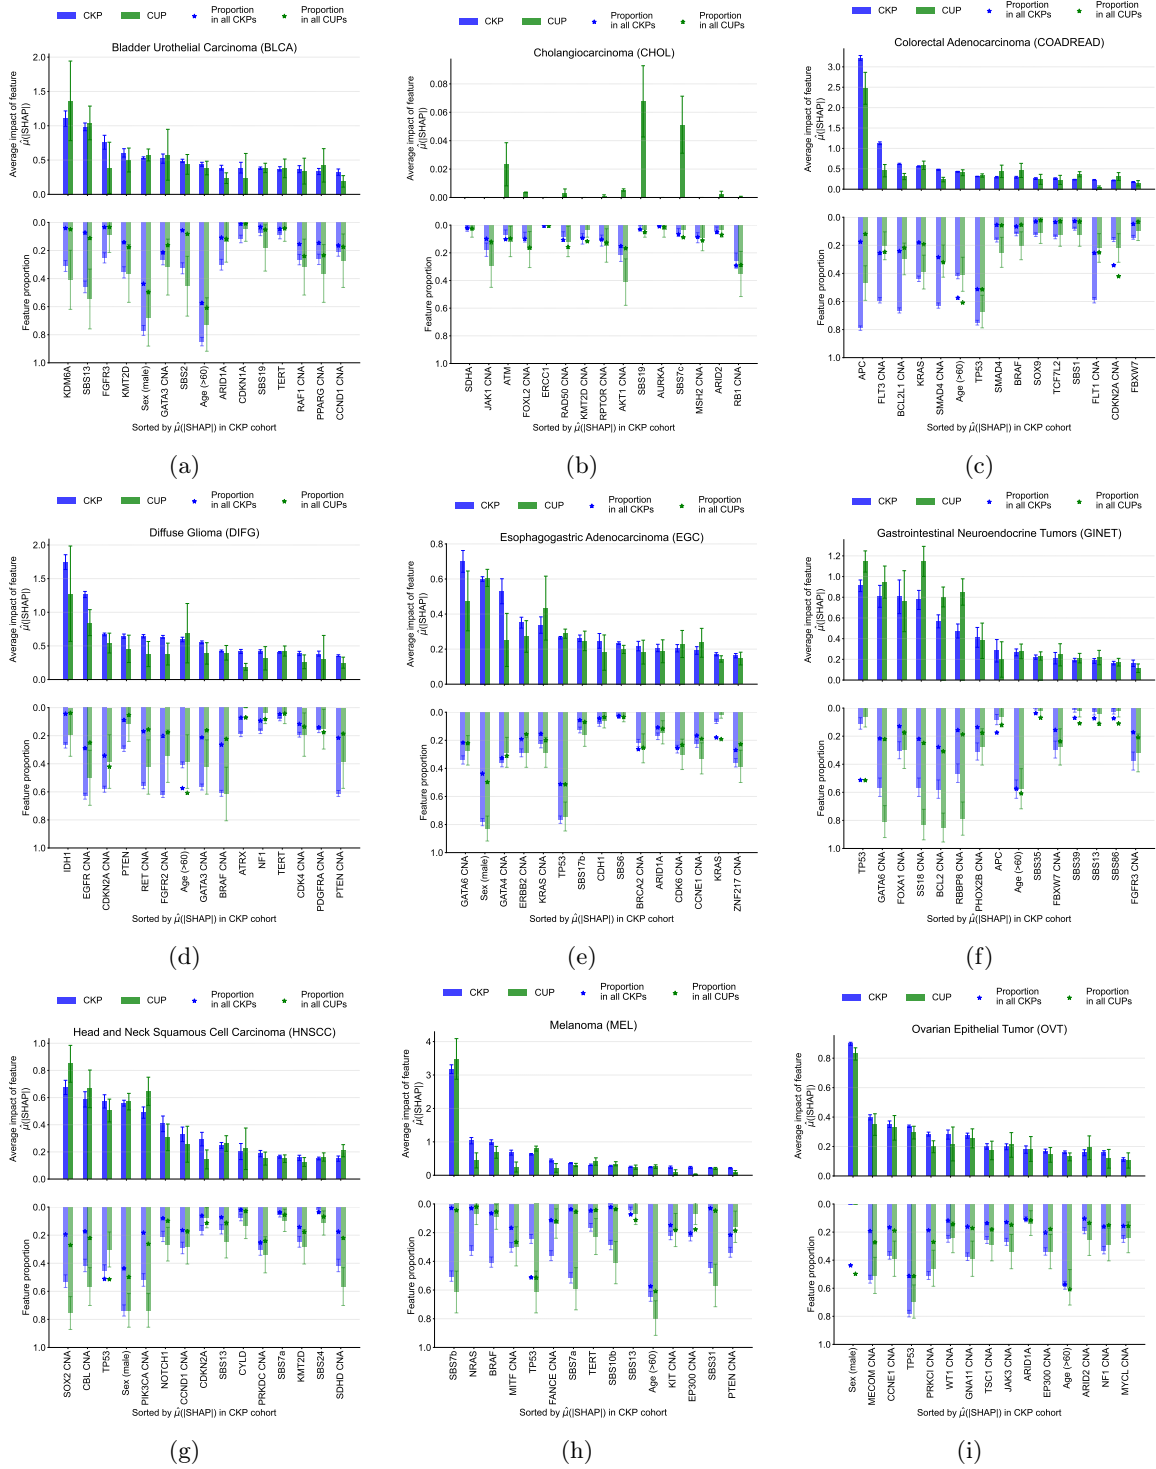

Figure S2

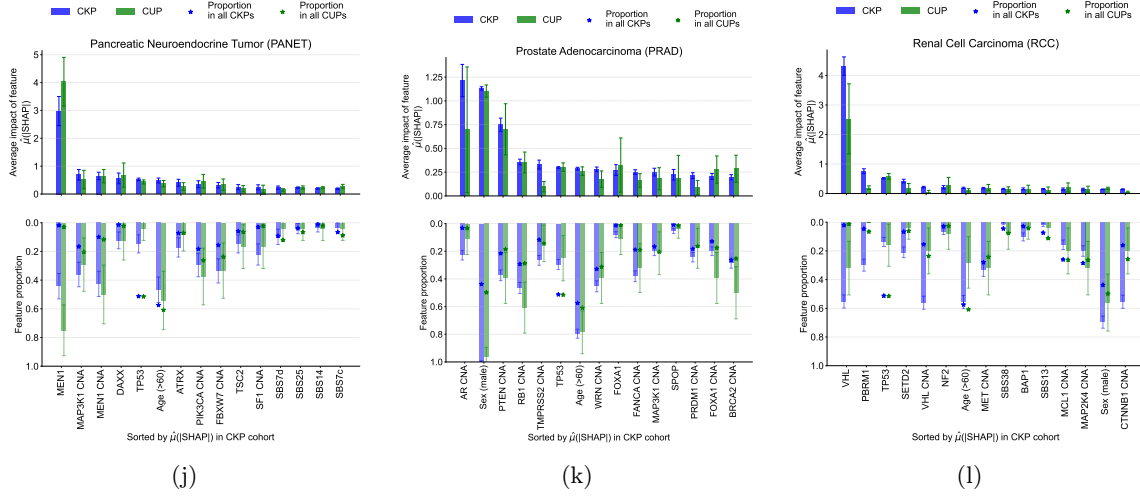

Figure S2: **Interpreting OncoNPC predictions.** Top 15 most important features, based on mean absolute SHAP values (i.e.,  $\hat{\mu}(|\text{SHAP}|)$  [19]), for cancer types with at least 20 CUP tumors samples were classified.

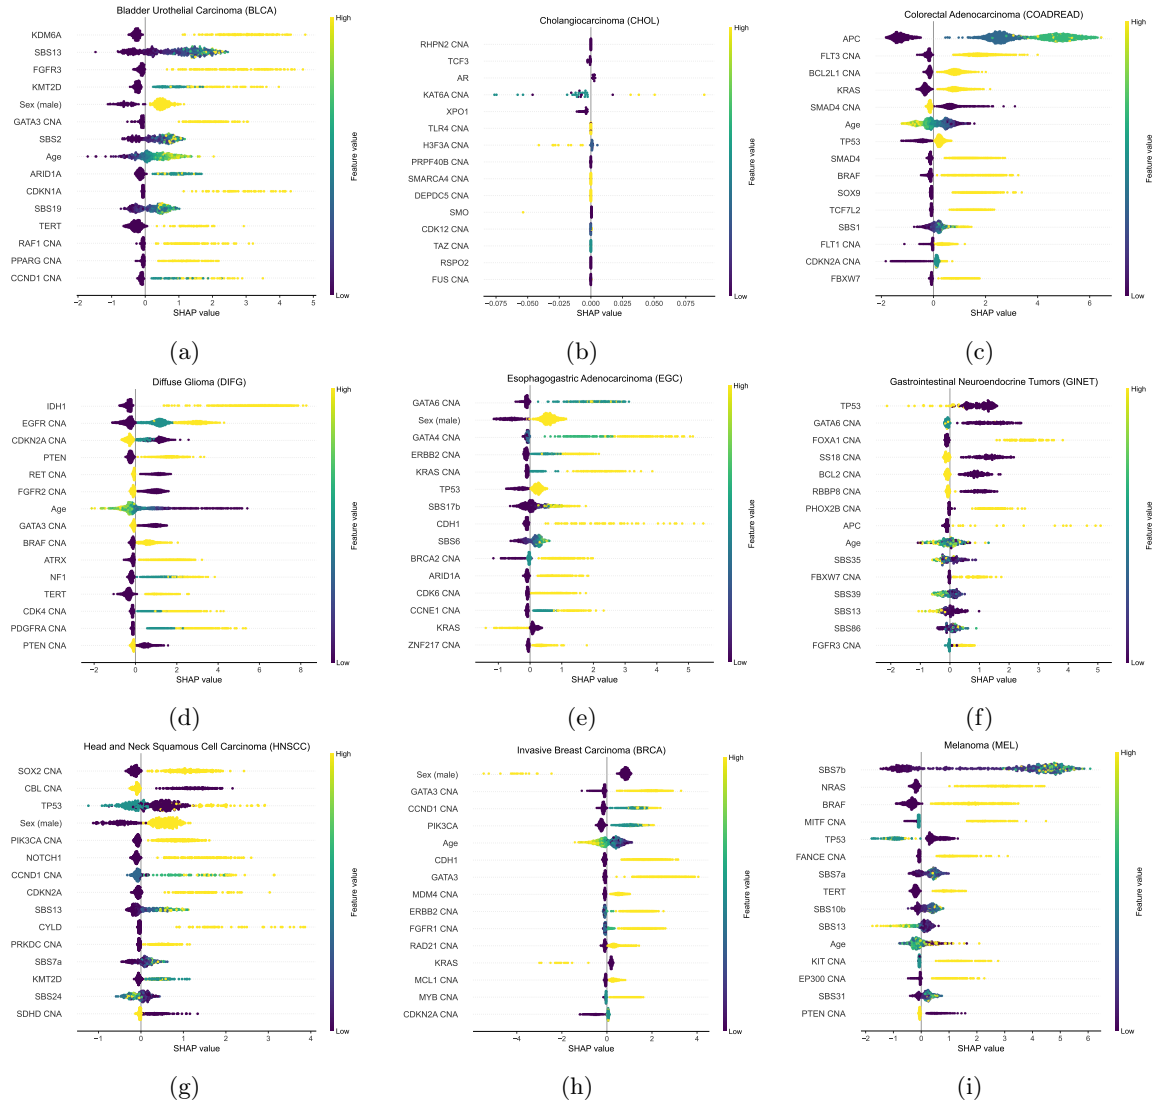

Figure S3

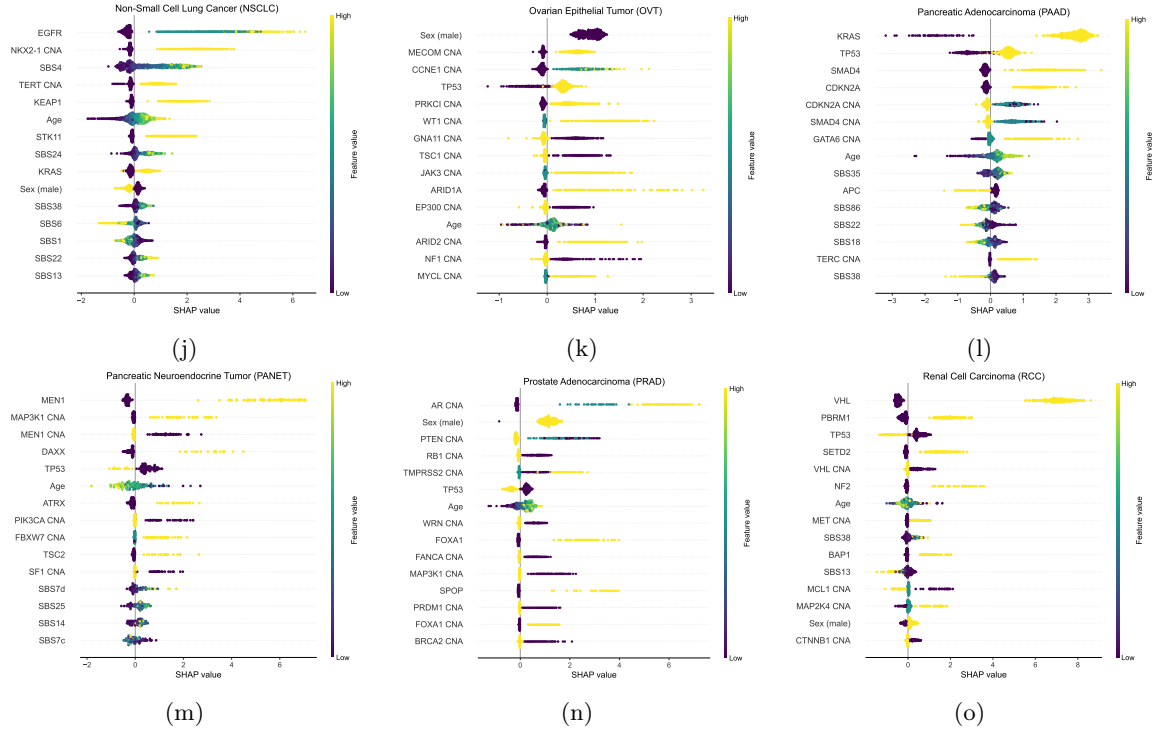

Figure S3: **SHAP summary plot** [19] for cancer types with at least 20 CUP tumors samples were classified. SAHP values (i.e., impact on OncoNPC predictions) are shown on the x-axis, while feature values are shown as a color map (from purple to yellow). In each plot, CUP and CKP tumor samples were combined into a single cohort for the corresponding cancer.

Predicted cancer type : Non-Small Cell Lung Cancer (NSCLC)  
Posterior probability : 0.98

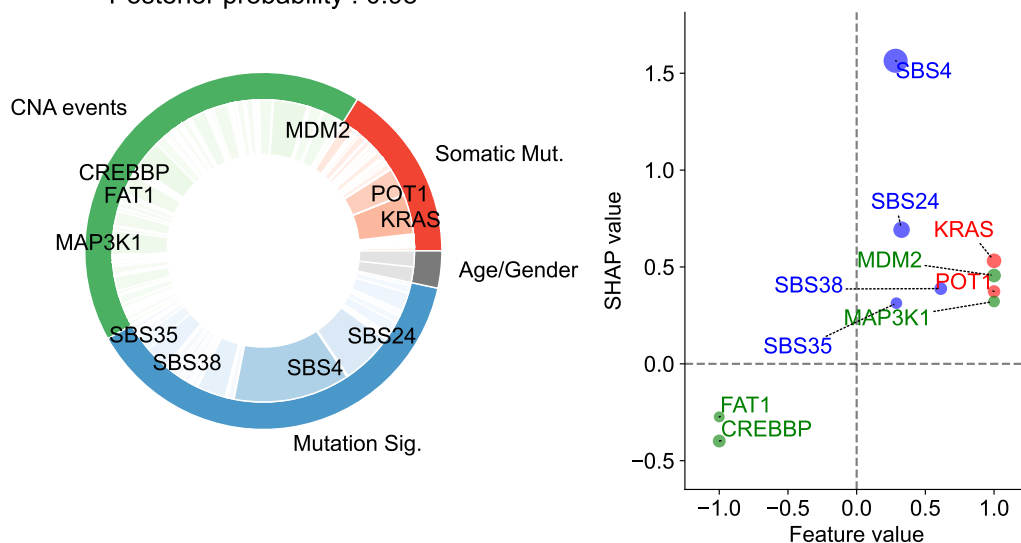

Figure S4: **Explanation of OncoNPC prediction for a patient with CUP.** The patient is a 76 year-old male, with a tumor biopsy from the liver. The pie chart on the left shows the Top 10 important features across three different feature categories (i.e., CNA events, somatic mutation, and mutation signatures), and the scatter plot on the right shows their SHAP values and feature values. The size of each dot is scaled by corresponding absolute SHAP value. From the chart review, we found that the patient reported a 60-pack year smoking history, as well as having lived near a tar and chemical factory as a child. Despite the CUP diagnosis, OncoNPC confidently classified the primary site as NSCLC with posterior probability of 0.98. SBS4, a tobacco smoking-associated mutation signature, was significantly enriched in the patient's tumor sample, which has, by far, the most impact on the prediction; followed by SBS24 mutation signature associated with known exposures to aflatoxin [20]; and KRAS mutation. Note that inhalation of aflatoxin has been linked to cause primary lung cancer [60–62], and KRAS mutation is one of the most common drivers of NSCLC [63, 64].

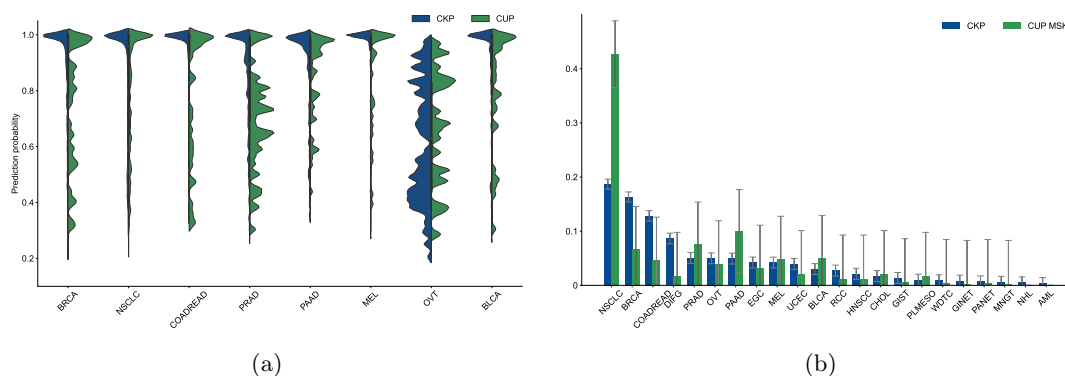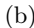



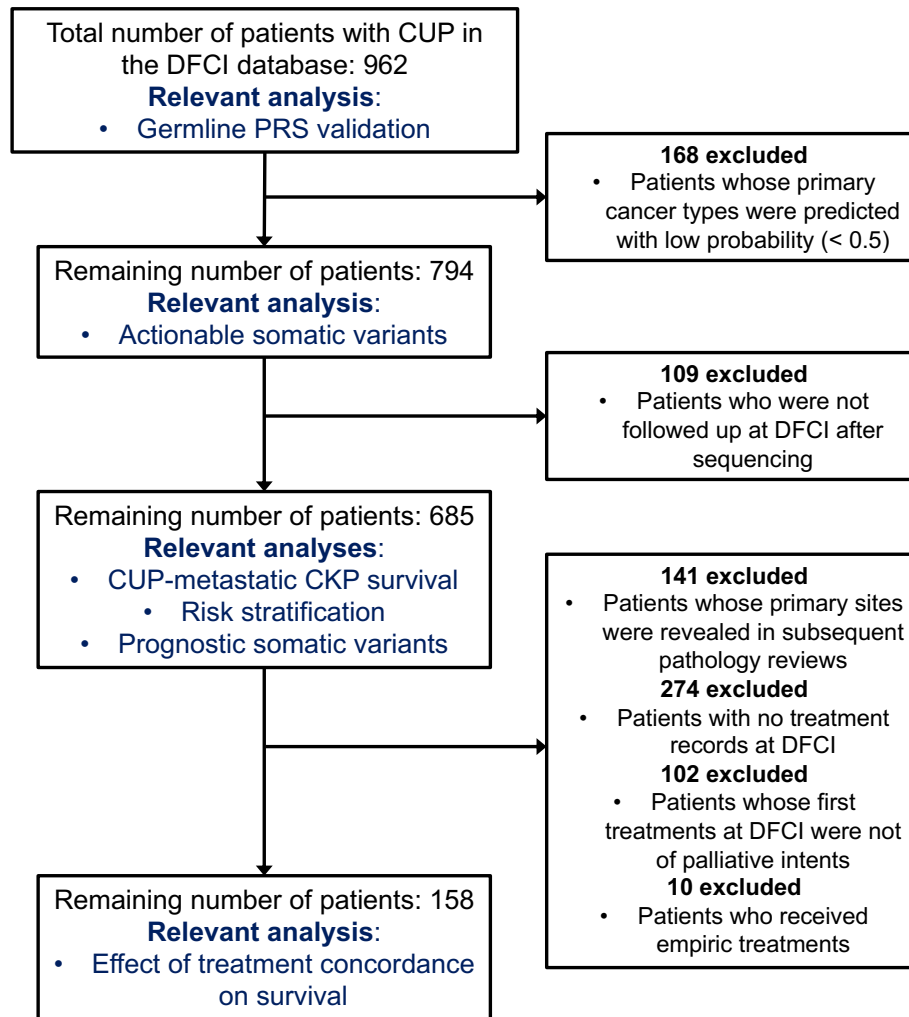

Figure S6: Exclusion criteria for downstream clinical analyses.

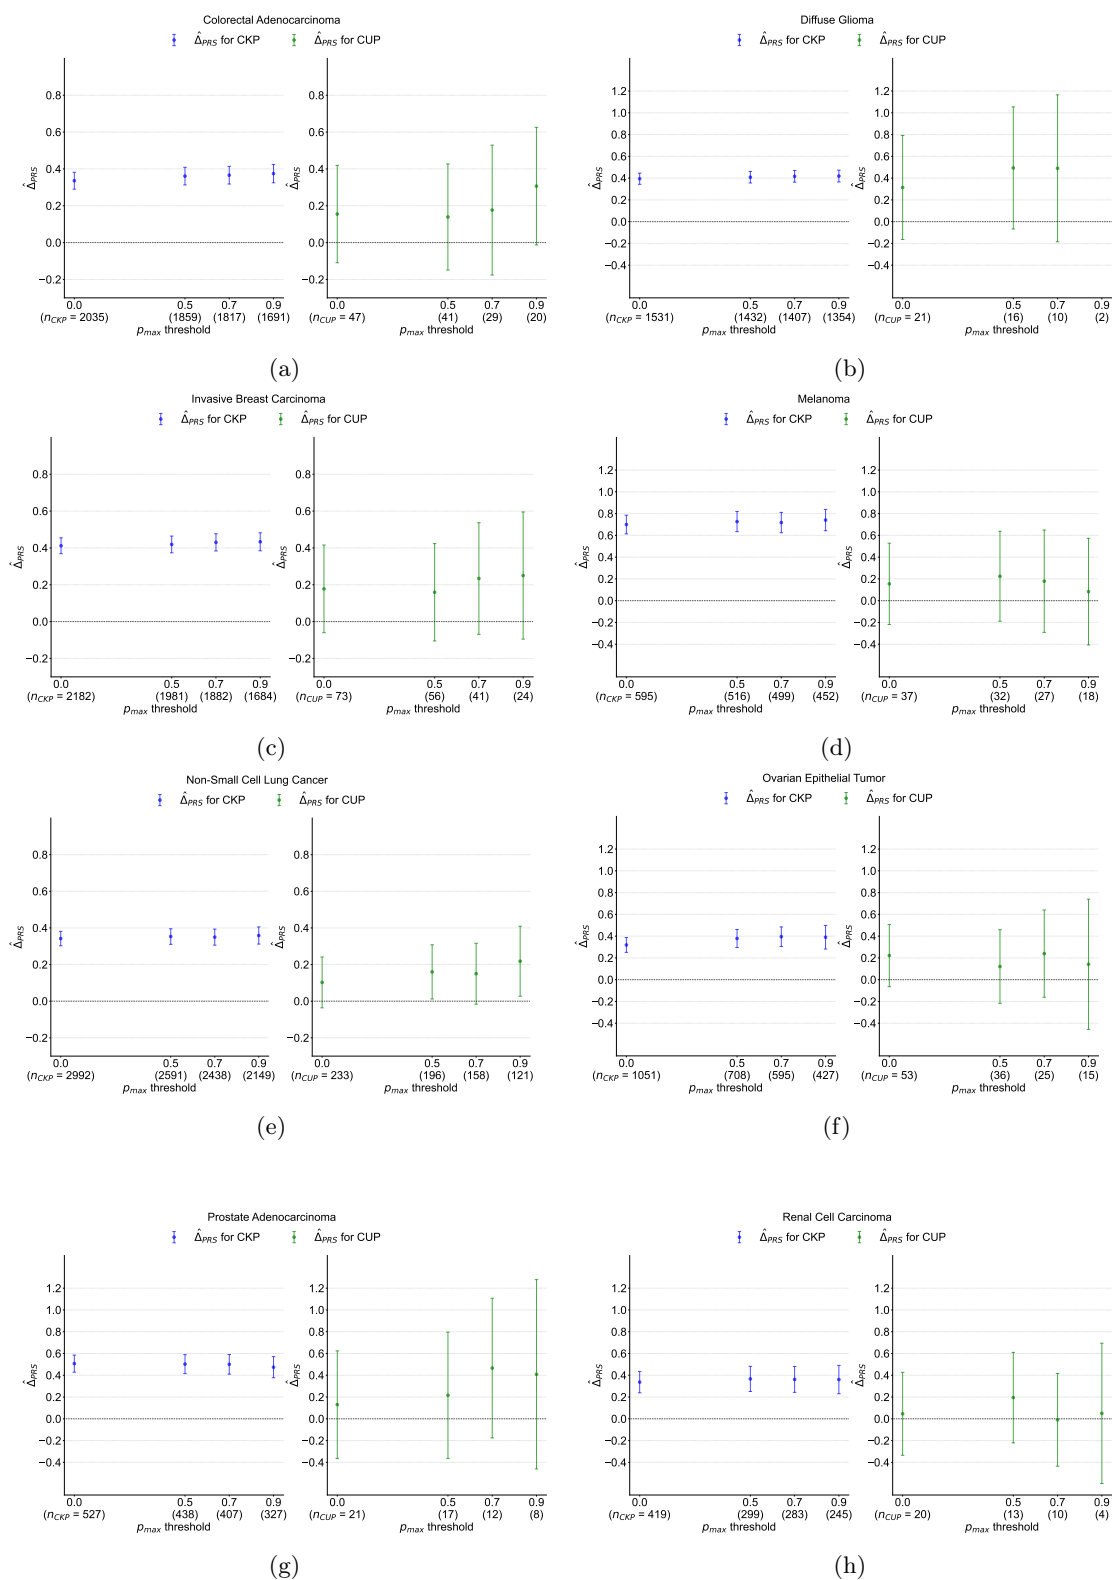

Figure S7

Figure S7: Germline Polygenic Risk Score (PRS) enrichment of CKP tumor samples and CUP tumor samples, broken down by 8 different cancer types: **(a)** Colorectal Adenocarcinoma (COADREAD), **(b)** Diffuse Glioma (DIFG), **(c)** Invasive Breast Carcinoma (BRCA), **(d)** Melanoma (MEL), **(e)** Non-Small Cell Lung Cancer (NSCLC), **(f)** Ovarian Epithelial Tumor (OVT), **(g)** Prostate Adenocarcinoma (PRAD), and **(h)** Renal Cell Carcinoma (RCC). The magnitude of the enrichment is quantified by  $\hat{\Delta}_{\text{PRS}}$ : the mean difference between the concordant (i.e. OncoNPC matching) cancer type PRS and mean of PRSs of discordant cancer types (see Methods).  $\hat{\Delta}_{\text{PRS}}$  is shown for CKPs in blue (for reference) and CUPs in green.

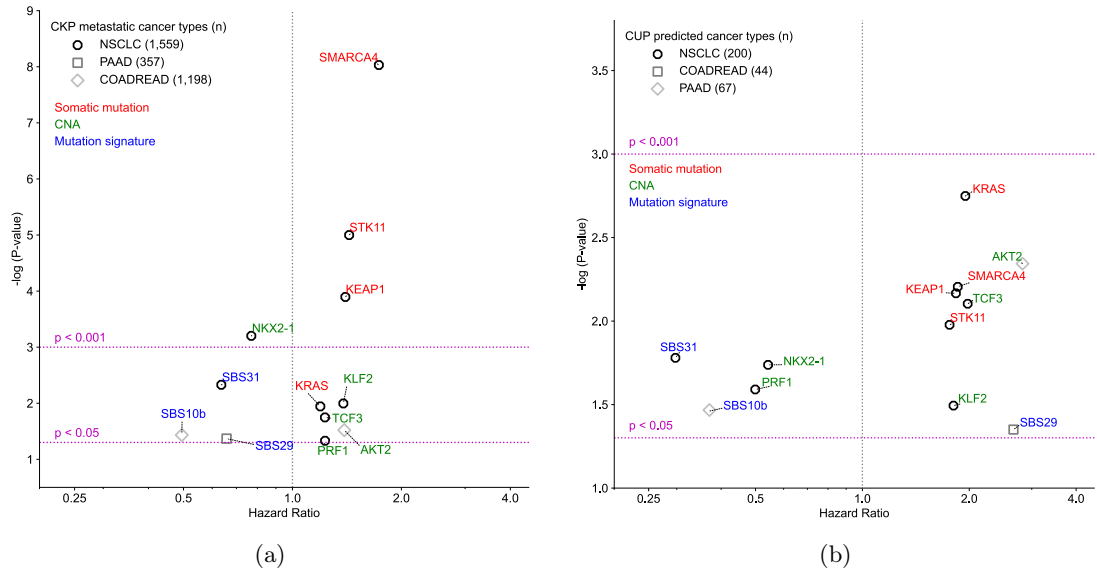

Figure S8: **Prognostic biomarkers between OncoNPC classifications and known cancers.** (a), (b) Prognostic somatic variants significantly associated with overall survival, shared between three different CUP (a)-metastatic CKP (b) pairs (NSCLC, PAAD, and COADREAD; indicated by point shape). Variant types are indicated by colors: red for somatic mutations, green for CNAs, and blue for mutation signatures.

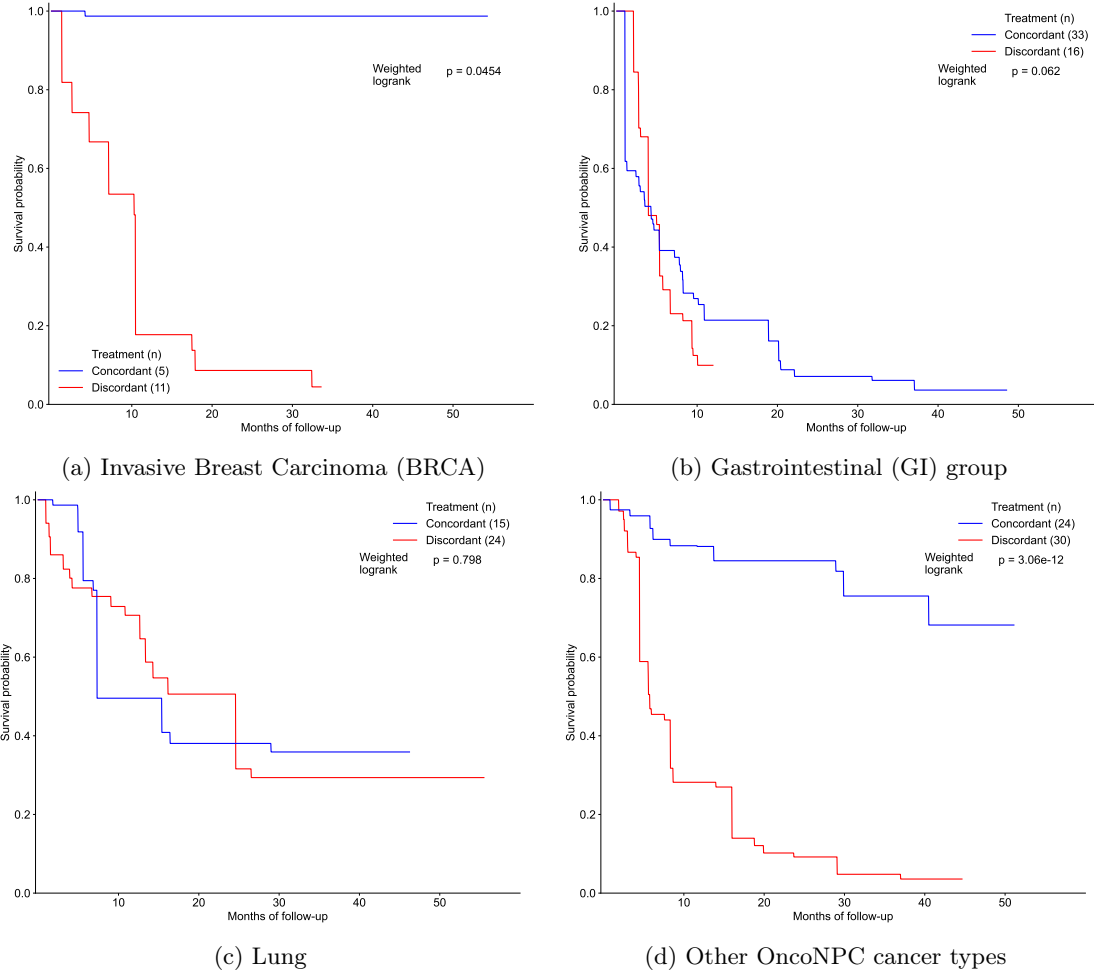

Figure S9: Estimated survival curves for patients with CUP, broken down by OncoNPC predicted cancer types: **(a)** BRCA, **(b)** Gastrointestinal (GI) group (CHOL, COADREAD, EGC, and PAAD), **(c)** Lung (NSCLC and PLMESO), and **(d)** other OncoNPC cancer types (BLCA, DIFG, GINET, HNSCC, MEL, OVT, PANET, PRAD, RCC, and UCEC). In each figure, the concordant treatment group and discordant treatment group are shown in blue and red, respectively. To estimate the survival function for each group, we utilized Inverse Probability of Treatment Weighted (IPTW) Kaplan-Meier estimator while adjusting for left truncation until time of sequencing (see Methods). Statistical significance of the survival difference between the two groups was estimated by a weighted log-rank test [59].

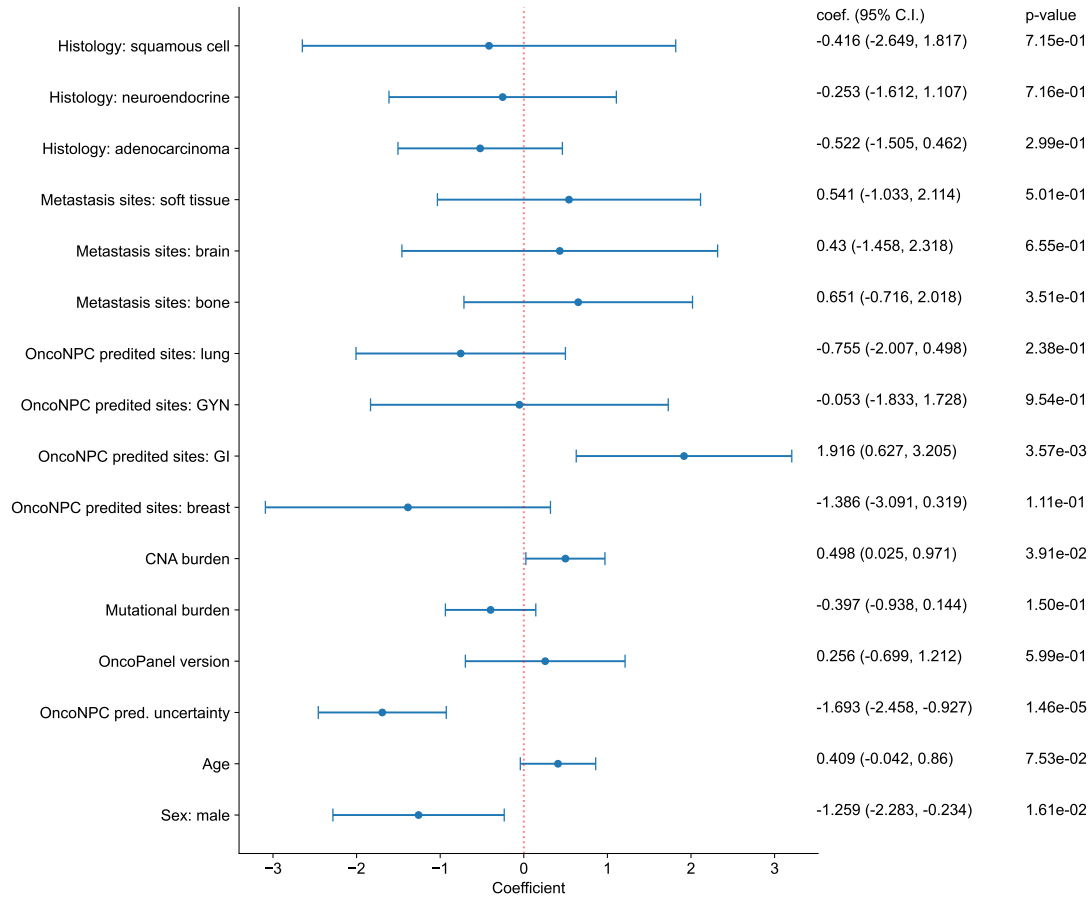

Figure S10: **Summary of coefficients for estimating treatment-OncoNPC concordance.** Formally, we estimated out-of-sample  $P(A|X)$ , where  $A$  corresponds to the treatment-OncoNPC concordance, using a logistic regression model in a 10-fold cross-fitting. The coefficients were obtained from the first fold. See Methods.

Table S1: Center-specific number of held-out CKP tumor samples, broken down by cancer types and prediction confidence (i.e.,  $p_{\max}$ ) thresholds.

|                                      |      | Minimum $p_{\max}$ threshold |      |      |      |
|--------------------------------------|------|------------------------------|------|------|------|
|                                      |      | 0.0                          | 0.5  | 0.7  | 0.9  |
| Overall                              | DFCI | 3690                         | 3438 | 3047 | 2502 |
|                                      | MSK  | 3331                         | 3012 | 2608 | 2112 |
|                                      | VICC | 268                          | 230  | 192  | 136  |
| Non-Small Cell Lung Cancer (NSCLC)   | DFCI | 811                          | 735  | 644  | 533  |
|                                      | MSK  | 717                          | 618  | 520  | 430  |
|                                      | VICC | 36                           | 27   | 23   | 19   |
| Invasive Breast Carcinoma (BRCA)     | DFCI | 600                          | 572  | 514  | 433  |
|                                      | MSK  | 727                          | 675  | 598  | 474  |
|                                      | VICC | 68                           | 62   | 48   | 35   |
| Colorectal Adenocarcinoma (COADREAD) | DFCI | 521                          | 502  | 479  | 436  |
|                                      | MSK  | 375                          | 358  | 330  | 303  |
|                                      | VICC | 55                           | 52   | 48   | 37   |
| Diffuse Glioma (DIFG)                | DFCI | 400                          | 390  | 383  | 361  |
|                                      | MSK  | 214                          | 204  | 187  | 168  |
|                                      | VICC | 11                           | 10   | 8    | 4    |
| Prostate Adenocarcinoma (PRAD)       | DFCI | 126                          | 118  | 98   | 67   |
|                                      | MSK  | 300                          | 280  | 233  | 163  |
|                                      | VICC | 16                           | 10   | 6    | 3    |
| Pancreatic Adenocarcinoma (PAAD)     | DFCI | 136                          | 125  | 104  | 71   |
|                                      | MSK  | 233                          | 216  | 187  | 154  |
|                                      | VICC | 10                           | 8    | 6    | 1    |
| Ovarian Epithelial Tumor (OVT)       | DFCI | 257                          | 229  | 184  | 112  |
|                                      | MSK  | 100                          | 60   | 38   | 10   |
|                                      | VICC | 12                           | 9    | 5    | 2    |
| Esophagogastric Adenocarcinoma (EGC) | DFCI | 171                          | 153  | 114  | 66   |
|                                      | MSK  | 82                           | 70   | 44   | 24   |
|                                      | VICC | 11                           | 8    | 7    | 2    |
| Endometrial Carcinoma (UCEC)         | DFCI | 123                          | 116  | 95   | 73   |
|                                      | MSK  | 105                          | 100  | 91   | 70   |
|                                      | VICC | 7                            | 6    | 6    | 2    |
| Melanoma (MEL)                       | DFCI | 134                          | 127  | 115  | 103  |
|                                      | MSK  | 108                          | 103  | 98   | 92   |
|                                      | VICC | 24                           | 24   | 23   | 23   |
| Bladder Urothelial Carcinoma (BLCA)  | DFCI | 86                           | 81   | 67   | 52   |
|                                      | MSK  | 93                           | 84   | 78   | 65   |
|                                      | VICC | 4                            | 4    | 4    | 3    |

|                                                |      | Minimum $p_{\max}$ threshold |     |     |     |
|------------------------------------------------|------|------------------------------|-----|-----|-----|
|                                                |      | 0.0                          | 0.5 | 0.7 | 0.9 |
| Renal Cell Carcinoma (RCC)                     | DFCI | 79                           | 71  | 61  | 50  |
|                                                | MSK  | 85                           | 75  | 68  | 56  |
|                                                | VICC | 6                            | 5   | 4   | 3   |
| Head and Neck Squamous Cell Carcinoma (HNSCC)  | DFCI | 55                           | 50  | 39  | 28  |
|                                                | MSK  | 27                           | 18  | 12  | 5   |
|                                                | VICC | .                            | .   | .   | .   |
| Cholangiocarcinoma (CHOL)                      | DFCI | 18                           | 12  | 10  | 7   |
|                                                | MSK  | 40                           | 31  | 24  | 16  |
|                                                | VICC | 1                            | .   | .   | .   |
| Gastrointestinal Stromal Tumor (GIST)          | DFCI | 47                           | 46  | 43  | 40  |
|                                                | MSK  | 34                           | 33  | 31  | 30  |
|                                                | VICC | .                            | .   | .   | .   |
| Well-Differentiated Thyroid Cancer (WDTC)      | DFCI | 17                           | 15  | 14  | 9   |
|                                                | MSK  | 31                           | 31  | 29  | 25  |
|                                                | VICC | 1                            | 1   | 1   | .   |
| Pleural Mesothelioma (PLMESO)                  | DFCI | 24                           | 21  | 14  | 10  |
|                                                | MSK  | 18                           | 17  | 10  | 6   |
|                                                | VICC | 5                            | 3   | 2   | 1   |
| Meningothelial Tumor (MNGT)                    | DFCI | 27                           | 25  | 23  | 20  |
|                                                | MSK  | 3                            | 3   | 1   | .   |
|                                                | VICC | 1                            | 1   | 1   | 1   |
| Gastrointestinal Neuroendocrine Tumors (GINET) | DFCI | 20                           | 17  | 16  | 11  |
|                                                | MSK  | 3                            | 3   | 2   | .   |
|                                                | VICC | .                            | .   | .   | .   |
| Pancreatic Neuroendocrine Tumor (PANET)        | DFCI | 15                           | 14  | 13  | 8   |
|                                                | MSK  | 24                           | 22  | 19  | 15  |
|                                                | VICC | .                            | .   | .   | .   |
| Acute Myeloid Leukemia (AML)                   | DFCI | 15                           | 11  | 10  | 6   |
|                                                | MSK  | .                            | .   | .   | .   |
|                                                | VICC | .                            | .   | .   | .   |
| Non-Hodgkin Lymphoma (NHL)                     | DFCI | 8                            | 8   | 7   | 6   |
|                                                | MSK  | 12                           | 11  | 8   | 6   |
|                                                | VICC | .                            | .   | .   | .   |

## Supplementary Notes

### Identifying prognostic somatic variants shared in CUP-metastatic CKP pairs

To identify prognostic somatic variants shared between CUP/metastatic-CKP pairs, we again restricted to the 7 common OncoNPC subtypes with at least 35 CUP patients: NSCLC, PAAD, BRCA, COADREAD, HNSCC, EGC, GINET, and OVT. For somatic variants, we utilized the same processed features utilized in the OncoNPC model training (see Methods: Feature selection and OncoNPC model interpretation). To ensure sufficient statistical power, we restricted to candidate somatic variants (i.e., mutated genes and CNA genes) present in at least 15 samples in a given OncoNPC subtype and corresponding metastatic CKP cohort, as well as all 96 mutational signatures.

After selecting the cancer types to consider in the CUP-metastatic CKP pairs and candidate somatic variants for each pair, we iteratively tested each feature for association with survival in each OncoNPC subtype and in each corresponding metastatic CKP cohort. A multivariable Cox Proportional Hazard regression [32] model was used with time-to-death from sequencing as the outcome. To adjust for baseline effects, we included age at sequencing, sex, tumor sequencing panel version, mutational burden (i.e., sum of total somatic mutations in each tumor sample), and CNA burden (i.e., sum of total CNA events in each tumor sample) as covariates. Finally, to identify shared prognostic somatic variants for each CUP-metastatic CKP pair, we retained somatic variants which passed Schoenfeld residuals-based proportional hazard tests (Python `lifelines` v0.27.4 [65]; p-value threshold: 0.05) and were nominally significant ( $p < 0.05$ ) for both CUP and CKP cancer types in each pair.

Three out of 14 tested CUP-metastatic CKP pairs (NSCLC, PAAD, and COADREAD) exhibited shared prognostic somatic variants significantly associated with overall survival with nominal p-value cut-off at 0.05 (Fig. S8a and S8b). In patients with known or classified NSCLC, three somatic mutations were associated with poor survival in both groups: SMARCA4 (CUP: H.R. 1.86, 95% C.I. 1.19 - 2.89, p-value  $6.23 \times 10^{-3}$ , CKP mets: H.R. 1.73, 95% C.I. 1.44 - 2.09, p-value  $9.30 \times 10^{-9}$ ), STK11 (CUP: H.R. 1.76, 95% C.I. 1.14 - 2.71, p-value  $1.05 \times 10^{-2}$ , CKP mets: H.R. 1.43, 95% C.I. 1.22 - 1.68, p-value  $1.00 \times 10^{-5}$ ), and KEAP1 (CUP: H.R. 1.83, 95% C.I. 1.18 - 2.85, p-value  $6.82 \times 10^{-3}$ , CKP mets: H.R. 1.40, 95% C.I. 1.18 - 1.66, p-value  $1.27 \times 10^{-4}$ ). These associations of somatic mutations in SMARCA4, STK11, and KEAP1 genes with overall survival are well established for NSCLC [66–68]. Interestingly, a CNA event in NKX2-1 was associated with improved survival in the patients from the NSCLC pair (CUP: H.R. 0.542, 95% C.I. 0.326 - 0.901, p-value  $1.83 \times 10^{-2}$ , CKP mets: H.R. 0.770, 95% C.I. 0.662 - 0.894, p-value  $6.28 \times 10^{-4}$ ), consistent with prior meta-analyses [69]. In patients with known or classified COADREAD tumors, SBS10b mutation signature, linked to polymerase epsilon exonuclease domain mutations [20], was associated with longer overall survival (CUP: H.R. 0.371, 95% C.I. 0.148 - 0.928, p-value  $3.41 \times 10^{-2}$ , CKP mets: H.R. 0.495, 95% C.I. 0.255 - 0.958, p-value  $3.68 \times 10^{-2}$ ). Finally, in patients with known or classified PAAD tumors, the SBS29 mutation signature (commonly found in tumor samples from individuals with a tobacco chewing habit [20]) was associated with poor survival in CUPs but nominally protective in metastatic



CKPs (CUP: H.R. 2.66, 95% C.I. 1.02 - 6.93, p-value  $4.46 \times 10^{-2}$ , CKP mets: H.R. 0.657, 95% C.I. 0.438 - 0.986, p-value  $4.28 \times 10^{-2}$ ). Although these somatic associations remain to be validated in independent cohorts, by categorizing patients with CUP based on their OncoNPC predictions, we were able to identify prognostic somatic variants, consistent with recent research findings.

## Determining treatment-OncoNPC concordance

Concordance of OncoNPC predicted cancer type with a first palliative treatment assignments at DFCI was classified in one of five categories: 1) “TRUE”: the OncoNPC cancer type matched the clinically proven/suspected tumor type and the predicted treatment matched the treatment received, which was dictated by NCCN guidelines and/or standard of care, within the clinical context provided by the medical record; 2) “FALSE”: the OncoNPC cancer type did not match the clinically proven/suspected cancer type and the predicted treatment was not appropriate per NCCN guidelines or standard of care, in most reasonable situations, and within the context of the medical record; 3) “SOFT FALSE”: the OncoNPC cancer type did not match the clinically proven/suspected cancer type, but the treatment received was not chosen based on NCCN guidelines or standard of care, owing to the unique clinical context provided by the medical record, 4) “EMPIRIC”: treatment received was empiric treatment for cancer of unknown primary (e.g., carboplatin/taxol or gemcitabine/cisplatin) with the corresponding clinical rationale; in cases where patients received these regimens but not with the clinical intent of empiric CUP treatment (i.e., as regimens intended for treating other tumor types), the predicted treatment was not labeled as “EMPIRIC” and the case was instead evaluated in context of the proven/suspected tumor type. In our analysis, we considered the TRUE group as the concordant group, and FALSE and SOFT FALSE groups as the discordant group. We did not include the EMPIRIC group, which is typically a more challenging patient population with systematically worse outcomes [40].
